# Supplementary material
Source: HighWire-hosted journal article supplement (https://injuryprevention.bmj.com/content/30/3/224)
Supplement: inline-supplementary-material-1 [file inline-supplementary-material-1.pdf]

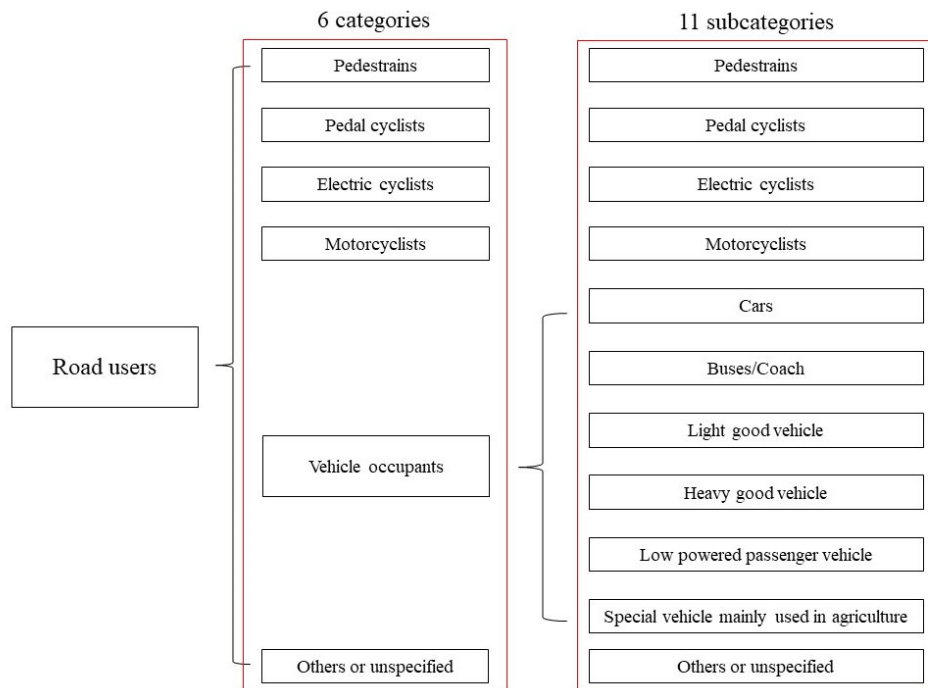

**Appendix Figure 1**

Road user classification according to the ICD-11

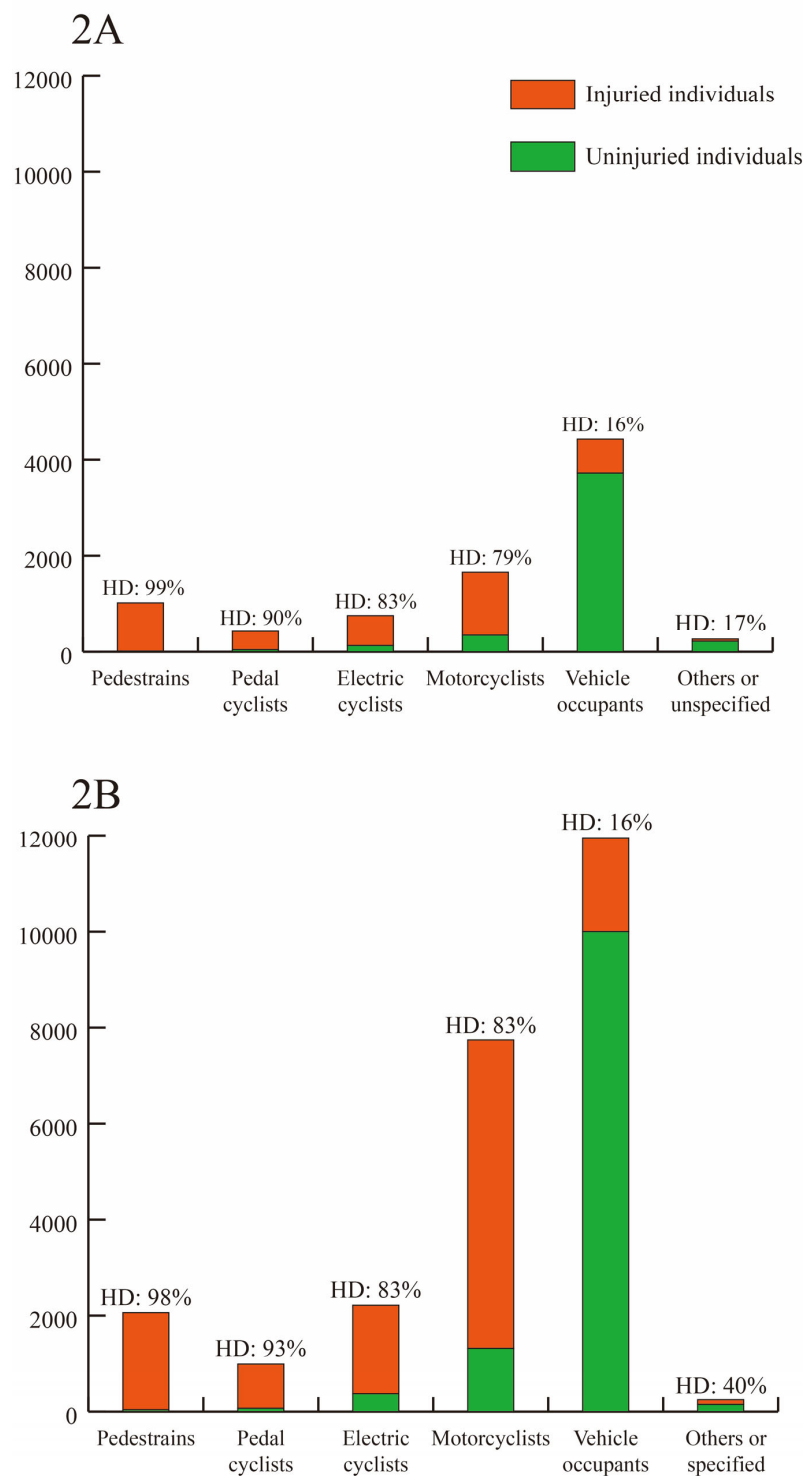

### Appendix Figure 2

Distribution of road traffic injuries by type of road user in Guangzhou: Migrant workers vs. the control group; 2A: Control group; 2B: Migrant workers

Note: HD: human damage, which represents road traffic injuries/individuals involved in road traffic crashes (including uninjured and injured individuals).

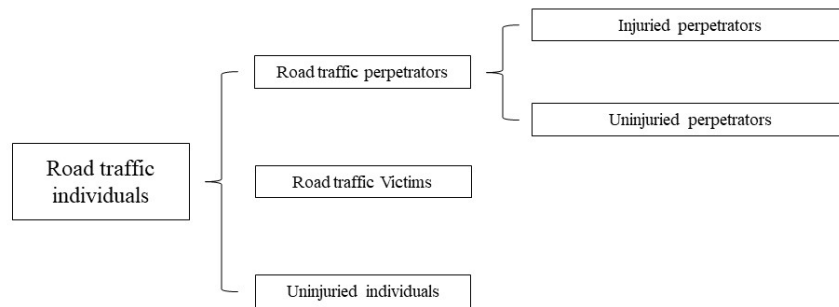**Appendix Figure 3**

Classification of individuals involved in road traffic crashes (according to the determination of responsibility and injury)
